# Supplementary material for: Salicylic Acid-Producing Endophytic Bacteria Increase Nicotine Accumulation and Resistance against Wildfire Disease in Tobacco Plants
Source: PubMed Central journal article supplement (PMC7022923; doi:10.3390/microorganisms8010031), 2019-12-22
Supplement: microorganisms-08-00031-s001.pdf [file microorganisms-08-00031-s001.pdf]

## Supplementary Materials

**Table S1.** Quantification of salicylic acid production by endophytic bacteria isolated from various plant species based on HPLC method.

| Plant species                       | Isolates | Isolates Identified as                                         | Tissues | SA production (µg/mL) |
|-------------------------------------|----------|----------------------------------------------------------------|---------|-----------------------|
| <i>Taxus brevifolia</i>             | EB-2     | <i>Micrococcus luteus</i>                                      | Fruit   | NM*                   |
|                                     | EB-7     | <i>Enhydrobacter aerosaccus</i>                                | Leaves  | NM                    |
|                                     | EB-17    | <i>Brachy bacterium rhamnsum</i>                               | Leaves  | NM                    |
| <i>Salix babylonica</i>             | EB-42    | <i>Pseudomonas syringae</i> pv. <i>phaseolicola</i>            | Leaves  | NM                    |
|                                     | EB-43    | <i>Xanthomonas campestris</i> pv. <i>campestris</i>            | Leaves  | NM                    |
|                                     | EB-44    | <i>Pseudomonas tremae</i>                                      | Leaves  | 57.05                 |
|                                     | EB-45    | <i>Xanthomonas campestris</i> pv. <i>campestris</i>            | Leaves  | NM                    |
|                                     | EB-46    | <i>Pantoea vagans</i>                                          | Leaves  | NM                    |
|                                     | EB-47    | <i>Curtobacterium herbarum</i>                                 | Leaves  | 46.22                 |
|                                     | EB-48    | <i>Curtobacterium plantarum</i>                                | Leaves  | NM                    |
|                                     | EB-49    | <i>Agrobacterium tumefaciens</i>                               | Leaves  | NM                    |
|                                     | EB-50    | <i>Xanthomonas gardneri</i>                                    | Leaves  | 44.24                 |
|                                     | EB-51    | <i>Bacillus altitudinis</i>                                    | Leaves  | NM                    |
|                                     | EB-53    | <i>Pseudomonas rhizosphaerae</i>                               | Leaves  | NM                    |
|                                     | EB-55    | <i>Curtobacterium citreum</i>                                  | Leaves  | NM                    |
|                                     | EB-56    | <i>Agrobacterium tumefaciens</i>                               | Leaves  | NM                    |
|                                     | EB-57    | <i>Curtobacterium flaccumfaciens</i> pv. <i>flaccumfaciens</i> | Leaves  | NM                    |
|                                     | EB-58    | <i>Curtobacterium plantarum</i>                                | Leaves  | NM                    |
|                                     | EB-59    | <i>Pseudomonas psychrotolerans</i>                             | Leaves  | NM                    |
|                                     | EB-60    | <i>Curtobacterium flaccumfaciens</i> pv. <i>flaccumfaciens</i> | Leaves  | NM                    |
|                                     | EB-62    | <i>Agrobacterium larrymoorei</i>                               | Leaves  | NM                    |
|                                     | EB-63    | <i>Enhydrobacter aerosaccus</i>                                | Leaves  | NM                    |
|                                     | EB-65    | <i>Brevundimonas vesicularis</i>                               | Leaves  | NM                    |
| <i>Metasequoia glyptostroboides</i> | EB-83    | <i>Pseudomonas syringae</i> pv. <i>phaseolicola</i>            | Cones   | NM                    |
|                                     | EB-84    | <i>Micrococcus luteus</i>                                      | Cones   | NM                    |
| <i>Ginkgo biloba</i>                | EB-87    | <i>Staphylococcus hominis</i> subsp. <i>novobiosepticus</i>    | Leaves  | NM                    |
|                                     | EB-124   | <i>Bacillus subtilis</i> subsp. <i>subtilis</i>                | Fruits  | NM                    |

\*NM-Not measurable amount of salicylic acid produced by endophytic bacteria, because minimum peak height was less than 0.1mV.
